# Supplementary material for: Insights into the mechanisms of electromediated gene delivery and application to the loading of giant vesicles with negatively charged macromolecules
Source: Royal Society of Chemistry journal article supplement (doi:10.1039/c0sm01389g), 2011-01-01
Supplement: c0sm01389g.pdf [file c0sm01389g.pdf]

**Supplementary information for the manuscript:**

Insights into the mechanisms of electromediated gene delivery and application to the loading of giant vesicles with negatively charged macromolecules

T. Portet, C. Favard, J. Teissié, D.S. Dean and M.-P. Rols

**Movie file:** guvdna.avi

**Movie title:** Electromediated DNA transfer into EggPC GUVs

**Movie legend:** Movie from a typical experiment of electromediated DNA transfer into EggPC GUVs, corresponding to Fig. 1 from the main text. Images acquired during the pulse sequence show the field polarity (+ and - signs), whereas subsequent images (acquired after the pulse sequence) do not. For electric pulse parameters, see legend of Fig. 1 in main text.
